# Supplementary material
Source: HighWire-hosted journal article supplement (https://jitc.bmj.com/content/9/5/e002339)
Supplement: inline-supplementary-material-8 [file inline-supplementary-material-8.pdf]

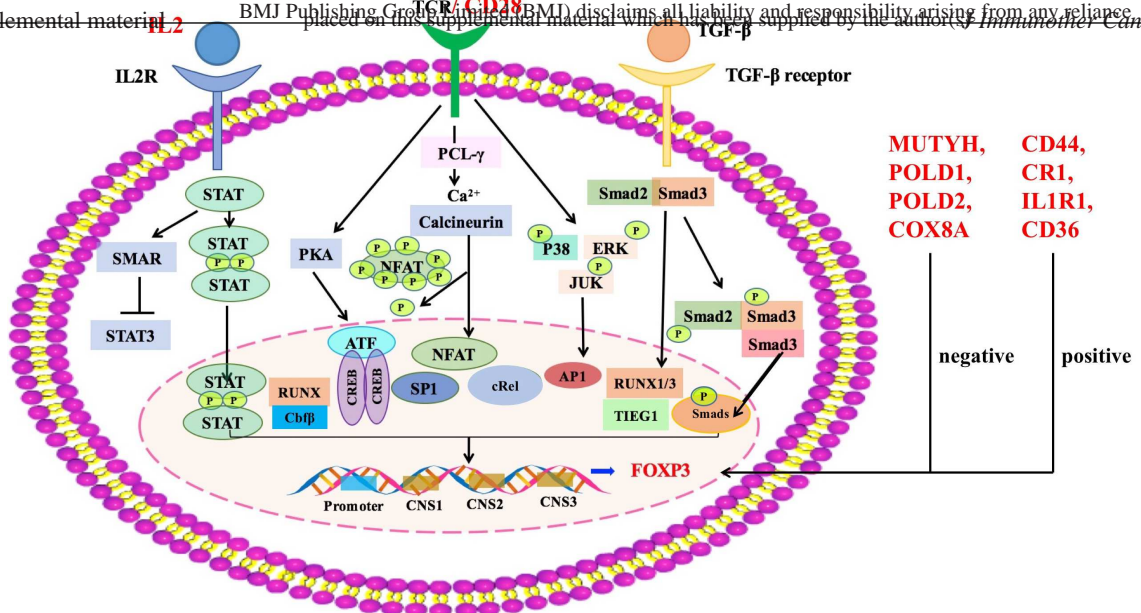

**MUTYH,  
POLD1,  
POLD2,  
COX8A**      **CD44,  
CRI,  
IL1R1,  
CD36**

negative      positive
